# Supplementary material for: Larvicidal Activity of Geranylacetone Derivatives against Culex quinquefasciatus Larvae and Investigation of Environmental Toxicity and Non-Target Aquatic Species
Source: MDPI journal article supplement (doi:10.3390/agronomy11112342), 2021-11-19
Supplement: s1 [file s1]

## Supporting Information

### **Figures S1-S12: Larvicidal Activity of Geranylacetone Derivatives against *Culex quinquefasciatus* Larvae and Investigation of Environmental Toxicity and Non-Target Aquatic Species**

Mohammed Al-Zharani <sup>1</sup>, Mohammed S. Al-Eissa <sup>1</sup>, Hassan A. Rudayni <sup>1</sup>, Daoud ali <sup>2</sup>, Saud alarifi <sup>2</sup> and Radhakrishnan SurendraKumar <sup>3</sup> and Akbar Idhayadhulla <sup>3,\*</sup>

| <b>S.No</b> | <b>Contents</b>                                                                                | <b>Page no.</b> |
|-------------|------------------------------------------------------------------------------------------------|-----------------|
| <b>1</b>    | Figures S1-S12: <sup>1</sup> H , and <sup>13</sup> C NMR spectrum of Compound ( <b>1a-1f</b> ) | 1 - 7           |

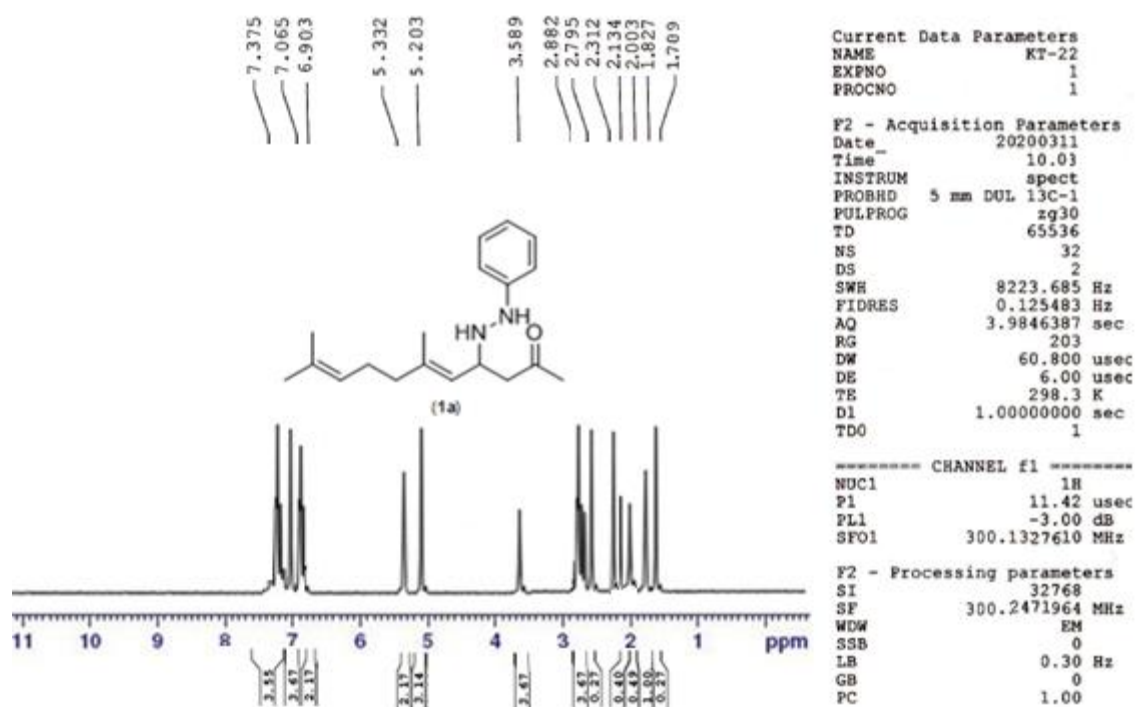

Figure S1:  $^1\text{H}$  NMR Spectra of compound **1a**

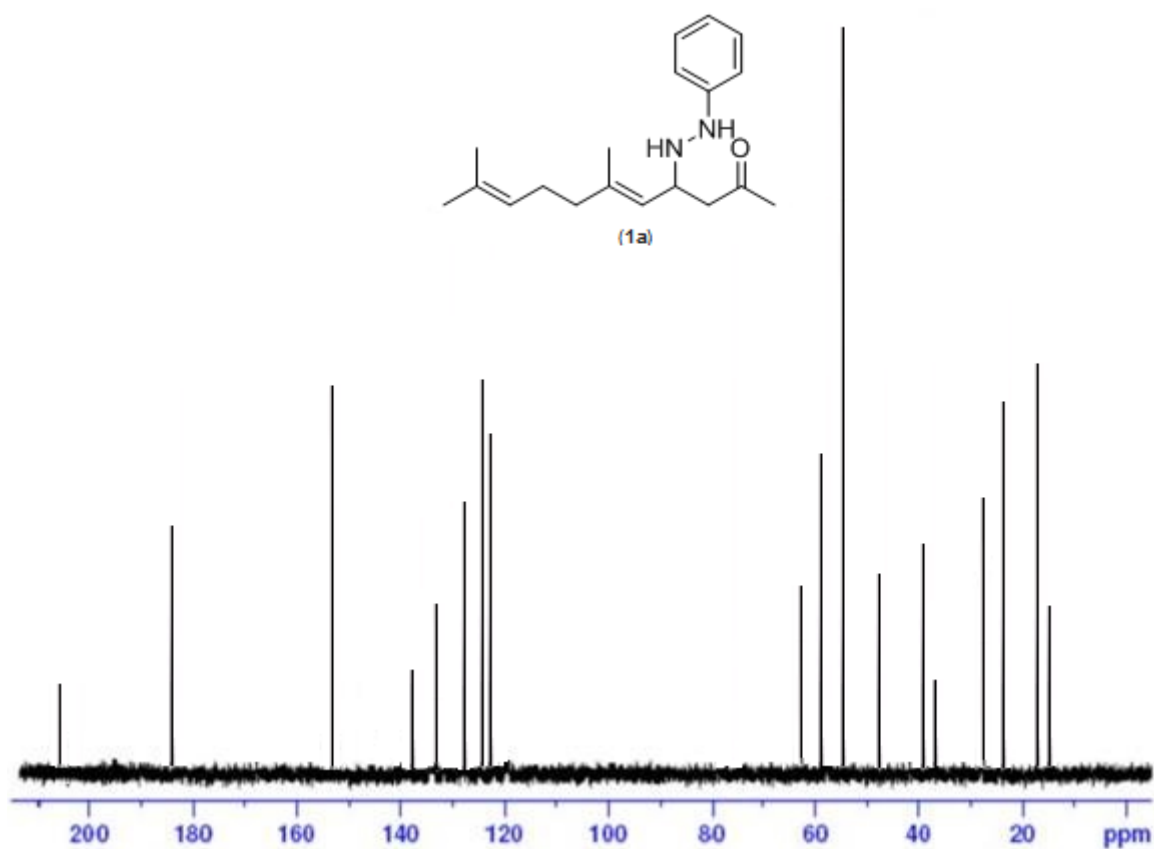

Figure S2:  $^{13}\text{C}$  NMR- Spectra of compound **1a**



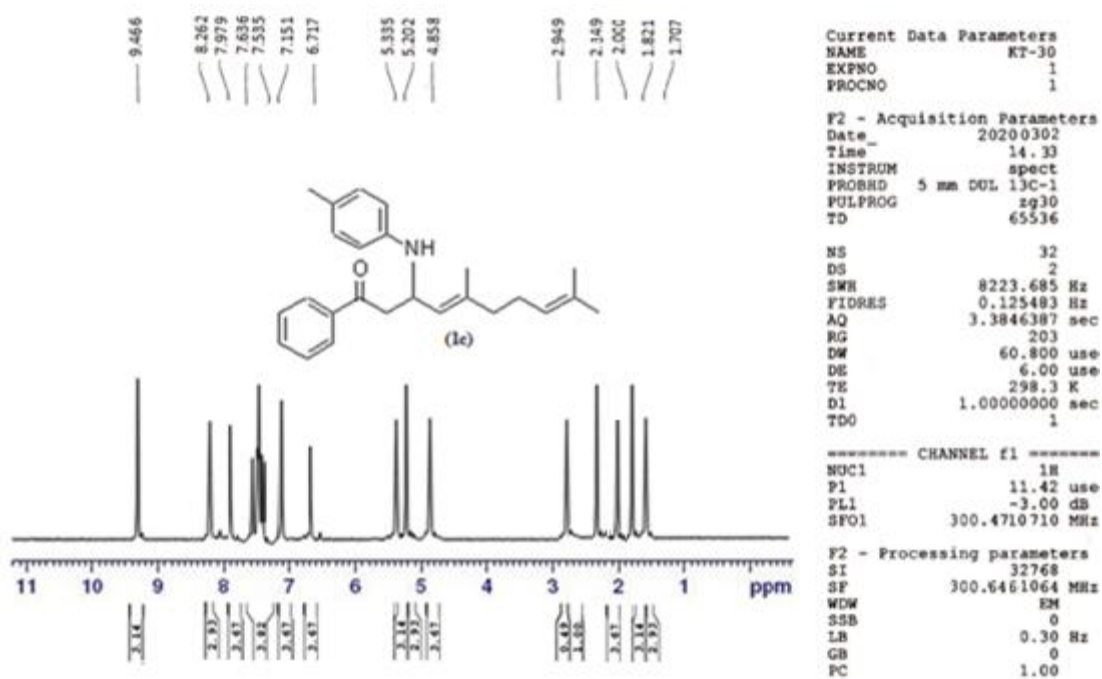

Figure S5:  $^1\text{H}$  NMR Spectra of compound **1c**

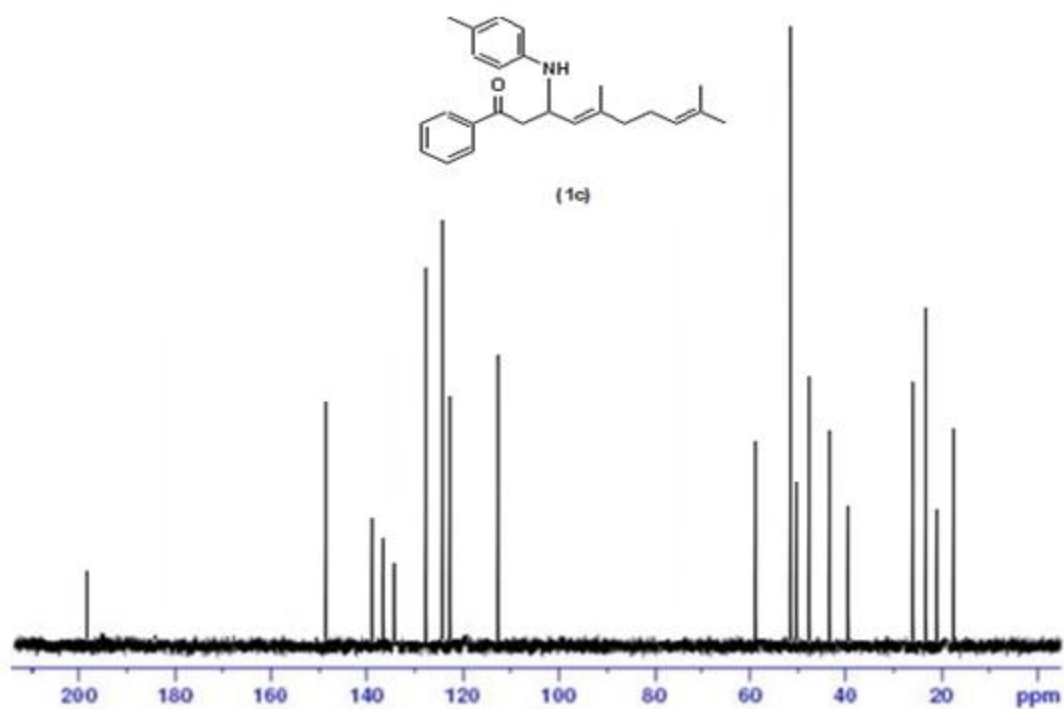

Figure S6:  $^{13}\text{C}$  NMR- Spectra of compound **1c**

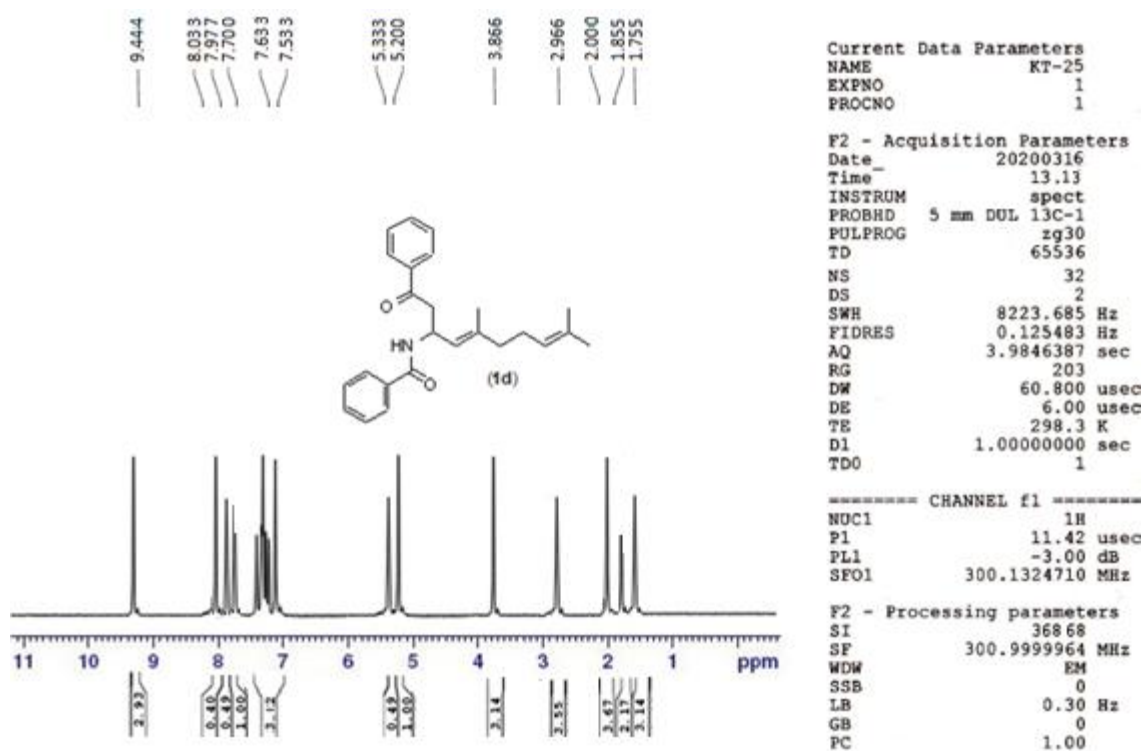

Figure S7: <sup>1</sup>H NMR Spectra of compound **1d**

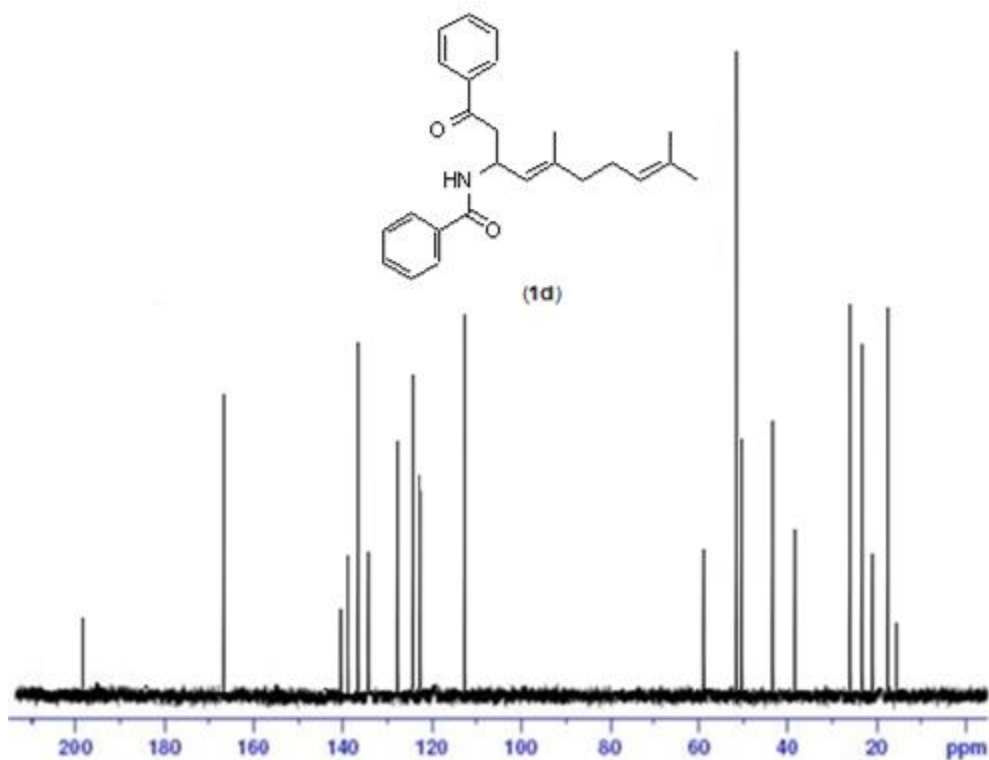

Figure S8: <sup>13</sup>C NMR- Spectra of compound **1d**

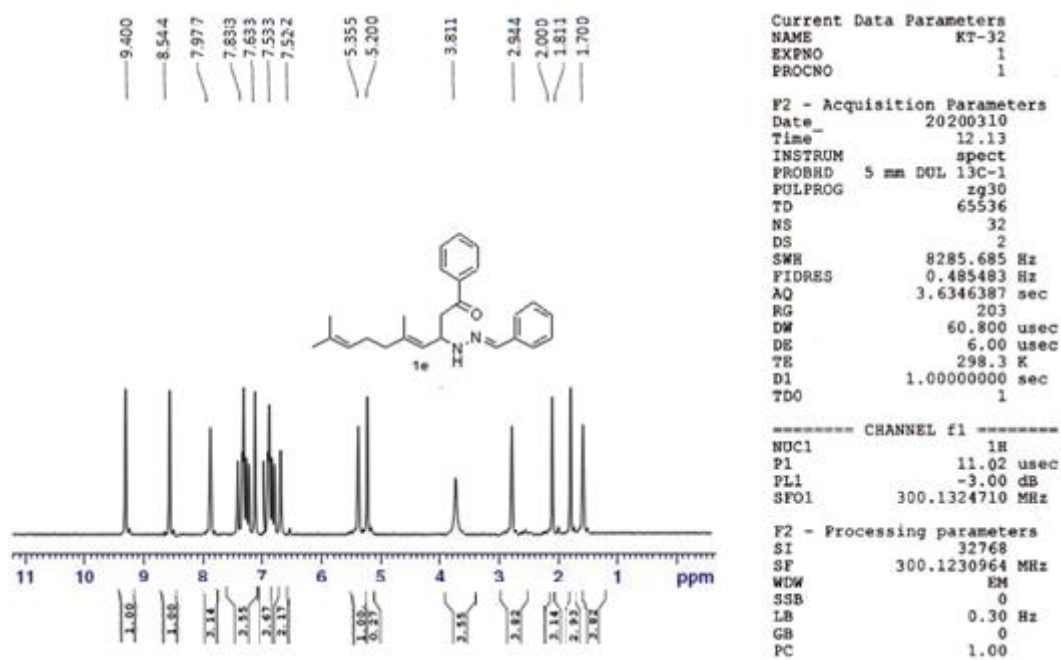

Figure S9: <sup>1</sup>H NMR Spectra of compound **1e**

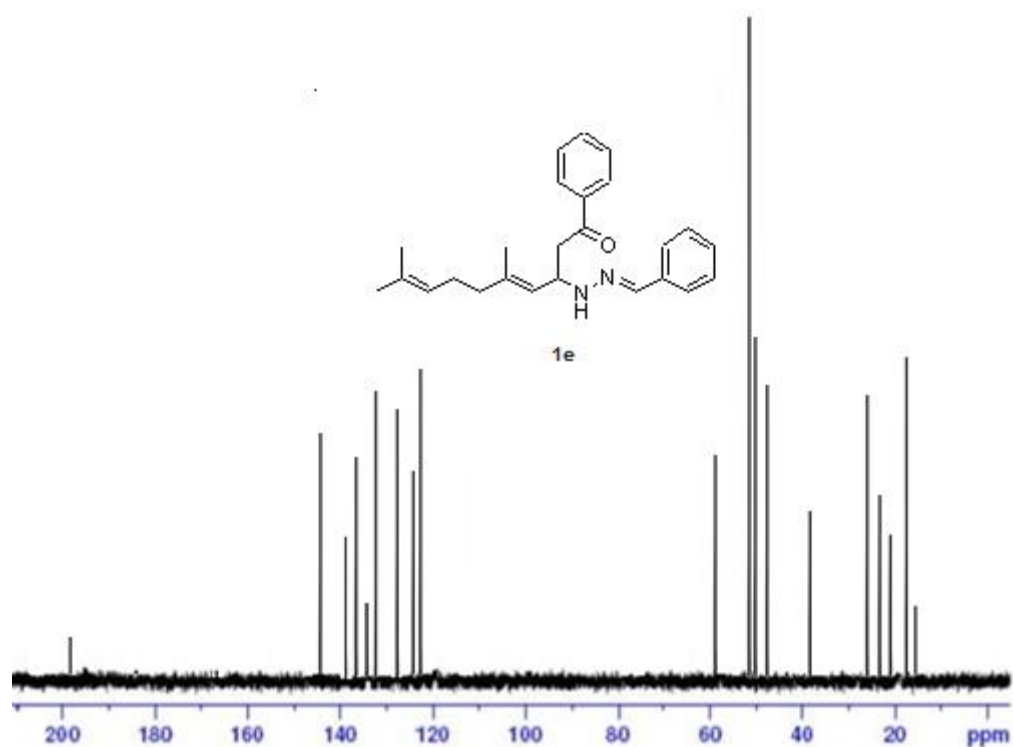

Figure S10: <sup>13</sup>C NMR- Spectra of compound **1e**

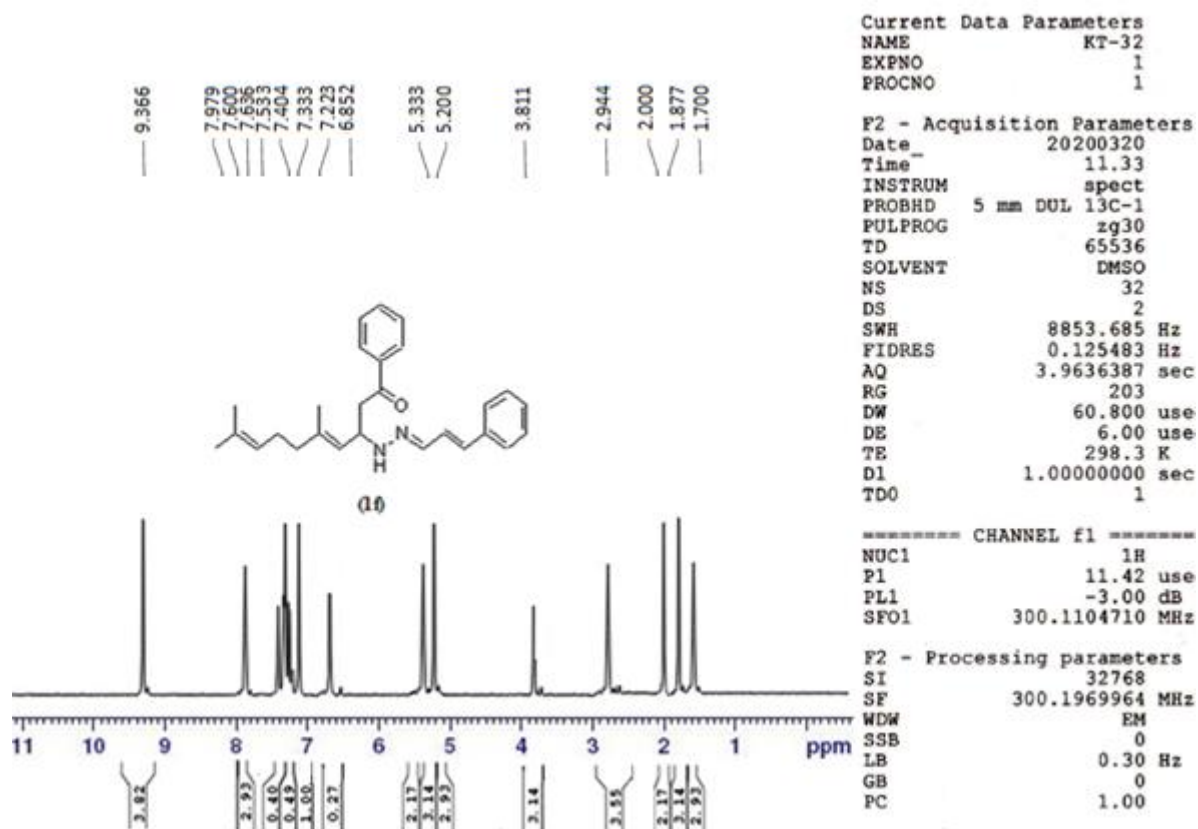

Figure S11:  $^1\text{H}$  NMR Spectra of compound **1f**

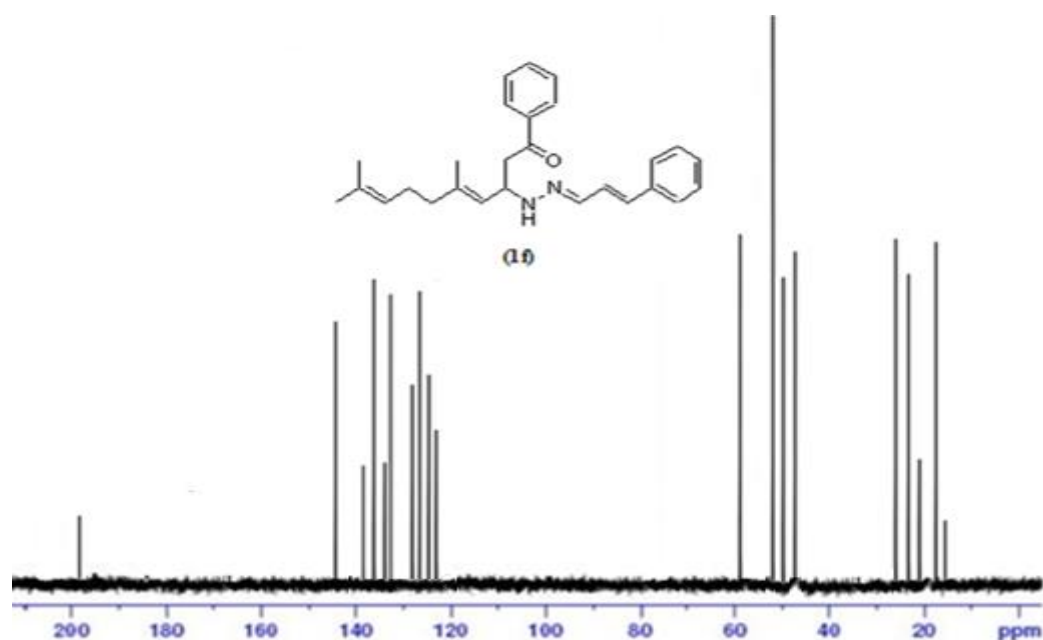

Figure S12:  $^{13}\text{C}$  NMR- Spectra of compound **1f**
